1 **Niche Availability and Competitive Facilitation Control Proliferation of Bacterial Strains Intended for Soil**  
2 **Microbiome Interventions**

3

4

5 Senka Čaušević<sup>1</sup>, Manupriyam Dubey<sup>1</sup>, Marian Morales<sup>1</sup>, Guillem Salazar<sup>2</sup>, Vladimir Sentchilo<sup>1</sup>, Nicolas  
6 Carraro<sup>1</sup>, Hans-Joachim Ruscheweyh<sup>2</sup>, Shinichi Sunagawa<sup>2</sup>, and Jan Roelof van der Meer<sup>1</sup>

7

8

9

10

11 1) Department of Fundamental Microbiology, University of Lausanne, 1015 Lausanne, Switzerland

12

13 2) Department of Biology, Institute of Microbiology and Swiss Institute of Bioinformatics, ETH Zurich,  
14 Vladimir-Prelog-Weg 4, 8093 Zurich, Switzerland

15

16 **ABSTRACT (max 150 words)**

17

18 Microbiome engineering, the rational manipulation of microbial communities and their  
19 habitats, is considered a crucial strategy to revert dysbiosis. However, the concept is in its  
20 infancy and lacks experimental support. Here we study the ecological factors controlling the  
21 proliferation of focal bacterial inoculants into taxa-complex soil communities and their  
22 impact on resident microbiota. We demonstrate using standardized soil microbiomes with  
23 different growth phases that the proliferation of typical soil inoculants depends on niche  
24 competition. By adding an artificial, inoculant selective niche to soil we improve inoculant  
25 proliferation and show by metatranscriptomics to give rise to a conjoint metabolic network  
26 in the soil microbiome. Furthermore, using random paired growth assays we demonstrate  
27 that, in addition to direct competition, inoculants lose competitiveness with soil bacteria  
28 because of metabolite sharing. Thus, the fate of inoculants in soil is controlled by niche  
29 availability and competitive facilitation, which may be manipulated by selective niche  
30 generation.

31

32

33 **Teaser (125 characters)**

34 Typical bacterial inoculants for soil microbiome engineering suffer from facilitating growth  
35 of native resident microorganisms

36  
37  
38  
39  
40  
41  
42  
43  
44  
45  
46  
47  
48  
49  
50  
51  
52  
53  
54  
55  
56  
57  
58  
59  
60  
61  
62  
63  
64  
65  
66  
67  
68  
69  
70  
71  
72

## INTRODUCTION

Microbiomes, the collective composite of microbial taxa and their habitats, play crucial roles in the functioning and health of their hosts or environments. Imbalanced or dysfunctional microbiomes pose a great challenge as they may present unstable developmental trajectories with a greater tendency for outgrowth of pathogens, reduced diversity, and/or diminished key ecological processes<sup>1-4</sup>. Consequently, there is an important need to understand whether and how interventions can be directed to equilibrate a microbiome's compositional or functional trajectory<sup>5,6</sup>.

A classical intervention to alter microbiome composition is the inoculation of one or more microbial strains with specific functionalities<sup>7</sup>, for example, to provide pollutant-degrading capacity for a contaminated site<sup>8,9</sup> or to enhance secondary metabolite production to deter potential plant pathogens<sup>10-12</sup>. However, despite the conceptual simplicity, such inoculations mostly fail to produce the intended effect<sup>7,12,13</sup>. The reasons for failure can be manifold but are reflected in the poor proliferation of the inoculated strain(s) within the targeted microbiome. Typically, probiotic therapies compensate for this effect by frequent (e.g., daily) reapplication of the strain mixture to temporally manifest and maintain the required function (14, 15). Nonetheless, the fundamental questions of why newly inoculated strains often struggle to establish in target microbiomes and, accordingly, why taxa-complexity provides microbiomes with invasion 'resistance' remain unresolved.

Niche availability is thought to be an important factor determining successful inoculant proliferation (16). The growth and development of a species-diverse microbiota is likely to exploit all carbon, nutrient, and spatial niches in their habitat leaving few open niches for incoming species to proliferate<sup>14-16</sup>. Consequently, as a result of emerging functionalities by the microbiome the habitat conditions may change further<sup>17</sup> to disfavor easy access and opportunities for new strains to grow. Furthermore, cells of freshly inoculated strains may not find appropriate spatial niches to be protected against predation, e.g., by protists<sup>18</sup>, resulting in their general decline<sup>19</sup>, or fail to establish profitable interactions with resident microbiota species<sup>7</sup>. Many of these arguments have not been subjected to systematic experimental testing of both the receiving microbiome and the introduced inoculant strain, and mechanistic concepts have been developed based on a small number of, frequently pathogenic, strains. We ourselves and others have recently argued how selective inoculation studies into defined microbiota, a concept we named N+1/N-1 engineering<sup>20</sup>, can be used to uncover underlying mechanisms of community assembly and development to guide future intervention practices.

The major objectives here were to study the importance of potential niche availability and interspecific interactions on the proliferation of soil inoculants intended for use either to reinforce xenobiotic compound metabolism or to provide plant-growth beneficial functions. Four inoculants were selected: two

73 are capable of degrading monoaromatic compounds such as toluene (*Pseudomonas veronii* 1YdBTEX2 and  
74 *Pseudomonas putida* F1)<sup>21,22</sup>, one is a plant-beneficial bacterium (*Pseudomonas protegens* CHA0)<sup>23</sup>, and  
75 one was selected as a non-soil strain control (*Escherichia coli*). To test the effects of niche availability we  
76 cultured standardized, taxonomically diverse, naturally-derived soil communities (NatComs) inside sterile  
77 soil microcosms according to a previously developed protocol (27). This system allowed us to test three  
78 conditions of niche availability for introduced inoculants. First, where all potential niches were assumed to  
79 be available and the inoculant would be in direct competition with NatCom to colonize the microcosm.  
80 Second, where the majority of niches were assumed to be occupied following precolonization by NatCom,  
81 after which the inoculant was introduced. Finally, we tested the effect of generating an inoculant-selective  
82 niche in the soil microcosms in the form of bioavailable toluene. Inoculant and NatCom populations were  
83 followed over time in their soil habitats, to estimate the realized niche from the extent of inoculant  
84 proliferation, and quantify any resulting changes in community diversity. To better understand the  
85 potential impact of biotic interactions on inoculant proliferation, we studied randomized paired-growth  
86 interactions between inoculant and soil bacteria in micro-agarose beads<sup>24</sup>. Finally, by metatranscriptomic  
87 analysis of enriched expressed gene functions, we evaluated *in situ* metabolic interactions by resident  
88 bacteria in a broader variety of soils as a consequence of *P. veronii* growth and its metabolism of toluene.  
89 Our results clearly indicate the generally poor proliferation of soil inoculants is a result of limited niche  
90 availability and their tendency to lose productivity as a result of metabolite sharing with resident soil  
91 bacterial taxa. However, the provision of an inoculant specific niche improves inoculant survival and allows  
92 its functional integration into the resident microbiome network.

93

## 94 **RESULTS**

95

### 96 **Producing taxa-diverse soil-cultured microbial communities in growing or stable states**

97 To investigate the potential for inoculants to find colonizable ecological niches within a complex resident  
98 soil microbiota, we produced two standardized types of community physiological 'states': (i) a growing  
99 resident community (*GROWING*) and (ii) a steady-state resident community (*STABLE*). Our hypothesis was  
100 that the introduction of an inoculant simultaneously with a resident community into a niche replete soil  
101 habitat would give all strains equal opportunity to colonize available niches and proliferation would be  
102 increased, whereas in the case of a *STABLE* niche depleted resident community inoculants would find fewer  
103 available niches and proliferation would suffer.

104

105 Resident soil microbiota was grown from existing soil communities (NatComs)<sup>25</sup>, which had been  
106 maintained for 1.5 years in soil microcosms. The soil microbiota were revived by mixing the colonized soil  
107 1:10 (v/v) into freshly prepared soil microcosms. In total 50 microcosms were produced, of which 5 were  
108 used for community analysis in Phase 1 and the rest for Phase 2, see below. Microcosms all consisted of a  
109 sterilized silt matrix supplemented with soil organic carbon solution (Fig. 1A). Diluted NatComs were

110 incubated for one month during which rapid growth was observed in the first days post dilution followed  
111 by a stabilization of the community size at  $8 \times 10^8$  cells  $g^{-1}$  soil (Fig. 1B). This density is comparable to the  
112 previously observed NatCom community size<sup>25</sup> and is similar to typical microbial cell densities in top soils  
113<sup>26,27</sup>, suggesting a maximum carrying capacity of the matrix and, thus, utilization of the available nutrient  
114 niches. Community succession was characterized by an initial increase in the most abundant phyla  
115 Firmicutes and Proteobacteria followed by slower-growing taxa, such as those from the Planctomycetes  
116 phyla (Fig. 1C). Lesser abundant members of Verrucomicrobia, Chloroflexi, Bacteroidetes, and  
117 Actinobacteria were also detected in the revived NatComs after one month (Fig. 1C). NatCom succession  
118 led to a temporary decrease in detectable richness and community evenness, which slowly increased and  
119 stabilized (Fig. 1B,  $P=0.0556$ , Wilcoxon test comparison of different replicates from  $T_0$  to Day 23 and Fig.  
120 S1). After one month, the revived NatComs again resembled their starting material (Fig. 1D, PcoA  
121 ordination based on Unifrac distances at species level). *Inter alia*, this experiment also showed that  
122 cultured taxonomically-diverse soil communities can be maintained within the soil for extended time  
123 periods without extensive taxa loss.

124

125 At the end of Phase 1 (Fig. 1A), all soil microcosms were pooled (the remaining 45, see above) and divided  
126 into two sets that served as resident background for testing inoculant proliferation. One part was diluted  
127 (1:10 v/v) in fresh soil matrix and nutrient to create a GROWING condition in Phase 2 (Fig. 1A), whereas  
128 the STABLE condition was produced purely from pooled and mixed material from the end of Phase 1 filled  
129 in new bottles (Fig. 1A). The GROWING NatCom showed rapid growth (19.8-fold average increase) in the  
130 first 10 days to a final average 47.2-fold size increase after 56 days (Fig. 1E, inset). Cell densities in the  
131 STABLE NatComs also increased, perhaps because of the pooling and mixing process at the end of Phase 1,  
132 but less than in the GROWING NatCom (2.8-fold after 10 days and 8.9-fold at day 56; Fig. 1E). During Phase  
133 2, the GROWING NatCom cell densities remained lower than in the STABLE NatComs (Fig. 1E,  $P=0.00403$ ,  
134  $F(1,5)=25.21$ , two-way repeated measures ranked ANOVA) but eventually reached similar values at day 56  
135 ( $P=0.1121$ , paired t-test). As expected for the faster proliferation of the GROWING NatComs during the first  
136 week, their taxa richness was initially lower than that of STABLE NatComs, but became similar from Day 14  
137 onwards (Fig. 1F). This apparent lower diversity is due to the saturation of sample sequencing depth by  
138 faster-growing species and a subsequent reduction in the detectable species count. Over time slower-  
139 growing species become more abundant and are redetected. The Shannon diversity index of GROWING  
140 NatComs also remained slightly lower throughout the incubation than that of STABLE NatComs (Fig. S1,  
141 ASV-levels;  $P=0.00014$ ). We thus concluded that, while the dynamic succession of GROWING and STABLE  
142 NatComs varied, the equivalent richness and size of either community meant they were suitable for testing  
143 the effect on inoculant proliferation.

144

145 **Inoculant establishment is dependent on niche availability and inoculant characteristics**

146 We tested the four selected bacterial inoculants (*P. putida*, *P. protegens*, *P. veronii*, and *E. coli*) for their  
147 potential to proliferate in microcosms under different conditions: axenically (ALONE), concomitantly with  
148 the freshly diluted NatCom (Phase 2 GROWING, starting at  $t=0$  as in Fig. 1E), or after NatCom establishment  
149 (STABLE, also starting at  $t=0$  in Fig. 1E). All inoculants constitutively expressed an introduced genetically  
150 encoded mCherry tag, which facilitated the quantification of their specific population size. Axenically, all  
151 three pseudomonads reached similar cell densities ( $1\text{--}3\times 10^7$  cells  $\text{g}^{-1}$  soil) in the microcosms after 3 days  
152 of incubation (Fig. 2A, ALONE), which corresponds to a 100-fold or more increase compared to their  
153 inoculated population sizes ( $1\times 10^5$  cells  $\text{g}^{-1}$  soil). This demonstrated that the strains could grow at the  
154 expense of available resources within the soil extract. As expected, *E. coli* proliferated poorly and only  
155 increased its cell density by 10–12-fold within the soil (3–4 generations; Fig. 2A, ALONE). Over time all  
156 axenic populations slowly decreased in size suggesting some cell death occurred.

157  
158 In contrast, when co-inoculated with GROWING NatComs or inoculated into STABLE NatComs all inoculant  
159 populations attained significantly lower population sizes than axenically in soil microcosms (Fig. 2A,  
160 Kruskal-Wallis test, *post hoc* Dunn pairwise test, S1 data). The average inoculant population sizes here  
161 reached between  $5\times 10^4\text{--}2\times 10^5$  cells  $\text{g}^{-1}$  soil, depending on the NatCom state and inoculant (Fig. 2B and C),  
162 but remained relatively stable until the end of the experiment (Fig. 2A, approx. two months). The growth  
163 and survival of inoculated pseudomonads was better in GROWING than in STABLE NatComs (Fig. 2B and  
164 C), whereas the population sizes of *E. coli* were the lowest among all inoculants and no different in  
165 GROWING or STABLE NatComs (Fig. 2B; 2C, Wilcox signed-rank test,  $P=0.68$ ). Among the pseudomonads,  
166 *P. protegens* showed the highest net population expansion (in comparison to the inoculated level; Fig. 2D),  
167 whereas both *P. protegens* and *P. putida* showed the highest average relative abundances (Fig. 2C; Fig. S2).  
168 The population densities of all pseudomonads after two months demonstrated they had survived in  
169 GROWING NatComs and maintained a size higher than their initial inoculum (Fig. 2E). These results support  
170 our hypothesis that the soil inoculants (all pseudomonads but not *E. coli*) were able to find more available  
171 niches for their establishment within a diverse soil resident community under GROWING conditions than  
172 in the background of an established STABLE community. The difference in inoculant proliferation in axenic  
173 microcosms compared with community growth indicated that only around 1% of the potential nutrient  
174 niche for the (pseudomonad) inoculants is available within a taxonomically diverse resident soil community  
175 (Fig. 2A, ALONE vs. GROWING or STABLE), thereby indicating that niche competition is a major factor that  
176 limits their expansion. Furthermore, these results showed that pseudomonads have better colonization  
177 success in soil than a poorly soil-adapted strains such as *E. coli*. However, they did not attain cell densities  
178 higher than two times the inoculum size.

179

180 **Creation of a specific niche favors inoculant establishment in resident communities**

181 To test whether inoculant outgrowth is limited by niche competition and not by *a priori* predation, we  
182 exploited the capacity of one of the inoculants (*P. veronii*) to metabolize toluene, which we could add as a  
183 unique additional carbon substrate (assuming that the ability of NatCom strains to metabolize toluene  
184 toluene would be limited). The GROWING and STABLE NatComs were thus exposed to toluene, which was  
185 provided in the gas phase of the microcosm from where it could reach the cells in the soil pore aqueous  
186 phase by diffusion.

187  
188 Supplementation of toluene had no statistically significant effect on the sizes of the STABLE NatCom (Fig.  
189 3A,  $P_{\text{STABLE}}=0.583$ ) but significantly increased their sizes by an average of 1.5-fold in GROWING NatComs  
190 ( $P_{\text{GROWING}}= 0.00151$ ). In contrast, *P. veronii* attained 100–200-fold larger population sizes in the presence of  
191 toluene compared to unamended microcosms, irrespective of being co-inoculated with GROWING or  
192 inoculated into STABLE NatComs (Fig. 3B, Kruskal-Wallis  $P=2.2\times 10^{-16}$ , *post hoc* Dunn test; S1 data).  
193 Eventually, the *P. veronii* populations declined in the presence of toluene but still maintained significantly  
194 higher levels than in its absence (Fig. 3B). This experiment thus demonstrated that the proliferation of an  
195 inoculant is significantly improved when it finds a specific and selective niche. It also suggested that it is  
196 effectively the absence of a selective niche and competition for shared niches that limited its development  
197 in the unamended NatCom microcosms.

198  
199 Considering that in toluene amended microcosms *P. veronii* composed 10%–20% of the total community  
200 size, we hypothesized that this may have caused secondary effects on resident populations. We thus  
201 compared paired taxa abundances in the absence or presence of *P. veronii*, per treatment, and over time  
202 (e.g., Fig. 3C and D). In the absence of toluene but with inoculated *P. veronii* there were only very few taxa  
203 outliers (defined as having 10-fold higher or lower abundances than expected for equal proportions), in  
204 either GROWING or STABLE NatComs (Fig. 3C). Outliers concerned a variety of low-abundance taxa, such  
205 as *Caulobacter*, *Enterobacter*, *Lysobacter*, *Pseudomonas*, and *Pseudoflavitea* (Fig. 3C), but appeared  
206 spurious as did not occur reproducibly across replicates and at more than one time point. The absence of  
207 clear effects was not surprising given the relatively low attained population size of *P. veronii* in these  
208 microcosms (<1%; Fig. 3C, Pv subplots).

209  
210 In contrast, more dramatic shifts in taxa abundances were observed in presence of toluene and, perhaps  
211 counterintuitively, more in STABLE than GROWING NatCom (Fig. 3D). GROWING NatCom exposed to  
212 toluene and inoculated with *P. veronii* were notably depleted in *Planctopirus*, *Devosia*, and *Paenibacillus*  
213 taxa, enriched for *Pseudomonas*, and both depleted and enriched in various *Stenotrophomonas* strains  
214 (Fig. 3C). Inoculation of *P. veronii* into STABLE NatComs led primarily to the enrichment of a variety of taxa  
215 and, to a lesser extent, the depletion of others (Fig. 3D). Across all conditions in the absence of toluene,  
216 the difference in magnitude of secondary taxa changes (quantified as the total outlier distance) was almost

217 undetectable for any of the inoculants (Fig. 3E). In contrast, taxa changes were more pronounced in the  
218 case of *P. veronii* inoculation in the presence of toluene, and largest for exposure of NatComs to toluene  
219 without *P. veronii* inoculation (Fig. 3E, Fig. S3). Interestingly, the *P. veronii* population size exposed to  
220 toluene declined less rapidly when resident NatCom was present (irrespective of GROWING or STABLE  
221 condition), compared to when it was growing axenically in microcosms (Fig. S3). This indicated, therefore,  
222 that *P. veronii* inoculation not only alleviates the negative effects of toluene exposure on the NatComs but  
223 that its longer-term survival benefited from the resident community.

224

### 225 **Inoculants lose productivity but favor growth of soil community members in random paired assays**

226 To gain a better understanding of the interactions between introduced inoculants and existing resident  
227 communities, we transitioned from system-level experiments to exploring a multitude of potential pairwise  
228 interactions between our chosen inoculants and resident soil community members. For this purpose, we  
229 employed a method where single inoculant cells are randomly encapsulated and incubated with isolated  
230 soil cells within 40–70  $\mu\text{m}$  agarose beads<sup>24</sup>. In contrast to the work above with standardized NatComs, we  
231 here used bacterial cells freshly washed from their natural soil matrix, thereby expanding the range of taxa-  
232 inoculant combinations being explored (Fig. S4). We hypothesized that, because of the proximity of  
233 founder cell pairs, growth interactions would lead to deviations in the average microcolony size distribution  
234 of inoculant or soil resident compared with either member growing individually.

235

236 Paired growth was quantified by estimating the size of fluorescent microcolonies inside beads at different  
237 incubation times. Inoculant colonies were distinguished from the fluorescently stained soil taxa courtesy  
238 of their mCherry-fluorescence labels. The average size of encapsulated *P. veronii* microcolonies, incubated  
239 with soil extract as the sole carbon and nutrient source, increased more over time if *P. veronii* was  
240 incubated alone (Fig. 4A, PV ALONE) compared to beads where *P. veronii* was paired together with soil  
241 community (Fig. 4A, PV WITH SC,  $p=0.0005$ , Fisher's two-tailed distribution test). Inversely, soil cells  
242 appeared to benefit from incubation with *P. veronii*, as the average microcolony size of soil cells increased  
243 when *P. veronii* was present as a partner (Fig. 4A, SC ALONE vs. SC WITH PV). This was not a result of  
244 differences in medium conditions because incidental beads in the inoculant-partner incubations with either  
245 only *P. veronii* (Fig. 4A, PV ALONE IN MIX) or only soil cells (Fig. 4A, SC ALONE IN MIX) showed similar  
246 average growth as the separate control incubations (incidental beads with individual taxa occupancy occur  
247 due to the random Poisson distribution of the encapsulation process).

248

249 The same pattern was observed under most tested nutrient conditions (i.e., soil extract, a defined solution  
250 of 16 carbon substrates, and toluene) and with each of the four inoculants (Fig. 4B). This suggests that all  
251 the inoculants transform primary substrates into metabolites or otherwise increase local nutrient  
252 availability, leading to growth benefit of other soil cells in proximity (i.e., within the same bead). The

253 process is disadvantageous for the inoculant itself as it reduces its own productivity. To show this more  
254 clearly, we selected beads from different time points containing exactly one inoculant and one soil cell  
255 taxon microcolony (Fig. 4C). This enabled us to detect shifts in paired productivities compared to the  
256 productivities expected from growth distributions of each member alone if they were indifferent to each  
257 other (Fig. 4C, *PREDICTED*). The experimental results clearly show a stronger than expected growth of soil  
258 taxa and consequently reduced growth of *P. veronii* in paired growth tests ( $p=7.6\times 10^{-5}$ , two-tailed t-test,  
259  $n=3$  experimental and 5 simulation replicates). We consistently observed similar outcomes across all four  
260 inoculant strains and in each growth condition, indicating the higher-than-expected growth of soil cells in  
261 paired beads with inoculants (Fig. S5). Thus, these findings demonstrated that, on average, all inoculants  
262 lose in substrate competition when in proximity of a soil cell, from which the latter can not only profit but  
263 more so than if growing alone. This also indicates that it is not only the direct loss of available niches, e.g.  
264 by faster-growing taxa, that limits inoculant growth but also the loss of competitiveness during niche  
265 transformation (i.e., *competitive facilitation*). Both effects help to explain why the inoculants established  
266 much more poorly in soil microcosms co-inoculated or precolonized with NatComs compared with sterile  
267 microcosms (Fig. 2A, GROWING and STABLE vs. ALONE).

268

269 To better understand whether competitive facilitation is soil taxa specific or general, we analyzed changes  
270 in OTU relative abundances as a function of growth conditions and inoculant using 16S rRNA gene amplicon  
271 sequencing of bead mixtures with or without inoculants (focusing only on *P. veronii* and *E. coli* as a negative  
272 control; Fig. 5). DNA isolated from beads after 48 h was dominated by 15–50 families ( $n=3$ , threshold > 10  
273 reads). Notably, soil extract as a sole nutrient source enabled the highest taxa diversity and growth (Fig.  
274 5A). As seen in the NatCom microcosms toluene caused a very selective effect and repressed the growth  
275 of most taxa. The number of families with significantly increased relative abundances in the presence of an  
276 inoculant was highest for *P. veronii* and toluene (eight enriched families and one depleted; adjusted P-  
277 value < 0.05) and lowest for *E. coli* and mixed-carbon substrates (Fig. 5A). The family of Micrococcaceae  
278 was enriched in all conditions when inoculated with *P. veronii* but not with *E. coli* (Fig. 5A, **M**). In  
279 comparison, when grown on the same carbon substrate mixtures, Micrococcaceae and Rhizobiaceae were  
280 more abundant in inoculations with *E. coli* and Burkholderiaceae and Enterobacteriaceae were more  
281 abundant with *P. veronii*, suggesting potential favorable metabolic interactions from inoculant to taxa from  
282 those families (Fig. 5B). Closer examination of Pseudomonadaceae (due to their generally high relative  
283 abundances) showed very little taxa sensitivity to the presence of the inoculant (except sequence variants  
284 ASVs I and II in Fig. 5C, which were more abundant with soil extract and absent on toluene) but did  
285 demonstrate sensitivity to the abiotic condition. For example, ASVs III and VI were relatively abundant in  
286 all incubations, whereas ASV-V was abundant in the presence of toluene but depleted in other substrate  
287 conditions (Fig. 5C). In contrast, ASV-IV was abundant in all conditions except for with toluene. Notably,  
288 these observations are based on relative normalized sequence abundances from incubations that contain

289 mixtures of beads with pairs of inoculants and soil cells, as well as soil cells or inoculant cells alone (as  
290 illustrated in Fig. 4A). Thus, these results indicated that both inoculants stimulated soil taxa when growing  
291 in proximity (Fig. 4B), without being particularly selective at family (Fig. 5A) or even strain level (ASVs, Fig.  
292 5C). Such evidence underscores the notion that successful inoculant proliferation in soil is challenging when  
293 only general substrates are provided due to competitive loss or, depending on the perspective, carbon  
294 facilitation to others.

295

### 296 **Inoculant toluene metabolism triggers a variety of cross-feeding pathways in the resident community**

297 Given the evident interactions taking place in the beads, we tried to delineate the potential cross-feeding  
298 network among resident soil bacteria arising from inoculation. We focused here specifically on inoculation  
299 of *P. veronii* and exposure to toluene, as under these conditions the inoculant population could establish  
300 sufficiently such that potential effects on resident bacteria might be detected. We hypothesized that while  
301 toluene provided a specific growth advantage to *P. veronii* within the NatComs, its metabolism could  
302 indirectly facilitate the growth of other taxa, as suggested by both the encapsulation experiments (Fig. 4C  
303 and Fig. 5A) and microcosm studies (Fig. 3D). Here, we took advantage of a previously conducted study  
304 where *P. veronii* was inoculated into two types of natural soils, Silt and Clay, and into a contaminated  
305 control soil from a former gasification site (Jonction)<sup>28</sup>. The use of varied, non-sterile soils and materials  
306 beyond standardized microcosms is important here to demonstrate the more general nature of *P. veronii*  
307 inoculation successes and its impacts.

308

309 Total RNA isolated from microcosms containing each soil type at early and late time points (Fig. 6A) was  
310 subjected to metatranscriptomic sequencing, assembly, and annotation to quantify gene expression levels  
311 of the native soil taxa. *P. veronii* established in Silt and Jonction soils exposed to toluene, while Clay soils  
312 demonstrated higher resistance to inoculant establishment despite toluene addition (Fig. 6A). Soils where  
313 *P. veronii* was actively growing (Fig. 6A, Silt and Jonction) also showed higher abundances of transcripts for  
314 ribosomal proteins, which indicates increased activity and growth of the resident community (Fig. 6B).  
315 Notably, uninoculated but toluene-exposed Silt resident communities had higher abundances of  
316 transcripts for ribosomal proteins but only later in the incubation. Resident microbiota transcripts  
317 associated with aromatic compound metabolism were enriched under toluene exposure in presence of  
318 inoculated *P. veronii*, particularly for pathways linked to known metabolites of the *P. veronii* toluene  
319 degradation pathway (Fig. 6C and D; I, II and III; Fig. S6). Such enrichments were particularly prevalent in  
320 Silt microcosms compared to their corresponding inoculated toluene-free or inoculated and toluene-  
321 exposed controls (Fig. 6D). Toluene exposure in the absence of *P. veronii* also provoked an increase in  
322 transcript abundance of aromatic compound degradation pathways but generally at the later sampling  
323 point, suggesting some growth of native toluene degrading strains. Jonction, as expected for an already  
324 contaminated soil, carried high transcript levels of a higher functional diversity of genes for aromatic

325 compound metabolism (Fig. S6 and S7). These transcripts could be assigned to close relatives of  
326 *Immundisolibacter cernigliae* and *Rugosibacter aromaticivorans* (Fig. S8), two known degraders of aromatic  
327 compounds<sup>29,30</sup>. Transcripts related to aromatic compound metabolism were generally low in the Clay  
328 microcosms, probably because *P. veronii* did not proliferate well and no secondary effects had taken place  
329 (Fig. 6A). Interestingly, the sum of transcripts in the resident soil microbiota for the exploitable toluene  
330 degradation products followed a log-linear correlation with their overall growth state, as estimated from  
331 transcripts for ribosomal proteins (Fig. 6B). For a small number of increased aromatic compound  
332 metabolism transcripts we traced the potential source organism (Fig. S7). As expected, identified taxa were  
333 already enriched in Jonction but other stimulated taxa in Silt and Clay became enriched following toluene  
334 and *P. veronii* exposure in agreement with the observed NatCom stimulation (Fig. 3D). In summary, these  
335 results show that the metabolism of toluene by *P. veronii* can elicit a cascade of cross-feeding pathways  
336 among resident soil bacteria.

337

## 338 **DISCUSSION**

339 Microbiome interventions based on strain inoculations are frequently frustrated by the poor proliferation  
340 of the inoculant and, thus, an insufficient display of their intended function<sup>7,12,13</sup>. To better understand the  
341 underlying ecological conditions and mechanisms leading to poor inoculant proliferation, we systematically  
342 studied the potential of available niches on the establishment of a variety of inoculant strains in soil  
343 microcosms containing taxa-diverse resident soil microbiota. Our studies benefitted from the reproducible  
344 culturing of taxa-complex soil microbiomes, which enabled us to contrast the proliferation of inoculants  
345 concomitant to growing soil microbiota with their invasion into a stabilized precultured soil microbiota  
346 background. By comparing the growth of inoculants axenically in the same soil microcosm conditions we  
347 found that only around 1% of the potential niche available to the inoculant is free in the presence of  
348 NatCom (Fig. 3A and C). The available niche was four times greater when the inoculant was co-inoculated  
349 with NatCom than if it was introduced *after* colonization by NatCom (Fig. 3C). This was only the case for  
350 pseudomonad inoculants and not for the non-soil strain control *E. coli*, which, as expected, survived very  
351 poorly when inoculated into NatCom. Given that the starting densities of inoculant in the case of GROWING  
352 community was approximately one-tenth of the estimated Proteobacteria proportion ( $1 \times 10^5$  inoculant  
353 cells  $g^{-1}$  compared to ca. 60% of  $2 \times 10^6$  cells  $g^{-1}$  soil, Fig. 1C&E) it is unlikely that these (opportunistic and  
354 fast-growing) *Pseudomonas* inoculants were outcompeted by faster consumption of primary growth  
355 substrates by NatCom taxa. Rather, as highlighted by random paired bead growth assays, inoculants lost  
356 productivity during growth, either by leakage of metabolites by the inoculant and their uptake by soil  
357 bacteria, by widespread secretion of growth-inhibitory substances, or both. The hypothesis of metabolite  
358 leakage and competitive loss is supported by our metatranscriptomic analysis of the specific case of  
359 inoculation of *P. veronii* and addition of toluene as a selective substrate. Our finding that, in bead confined

360 pairs, the increased growth of soil taxa comes at the cost of decreased inoculant growth also suggests that  
361 competitive loss is a major factor in inoculant survival along with, to a lesser degree, growth inhibition.

362

363 Diversity has frequently been suggested as a key factor controlling the establishment of new species in  
364 resident microbiomes<sup>5,31-33</sup>, whereas other studies have instead emphasized the importance of community  
365 productivity<sup>14,34</sup>. Both factors are inherently related, given that productivity reflects and depends on  
366 community composition within the resource richness of the habitat<sup>35</sup>. The more important underlying  
367 determinant of the community composition effect in this context, however, seems to be niche availability  
368<sup>14-16</sup>. Growing, habitat-adapted, taxa-diverse communities can be expected to utilize all nutrient and spatial  
369 niches, which would then limit the proliferation of incoming species (i.e., inoculants). We tested this  
370 principle directly by maintaining the same taxa-diverse NatCom in two system states: one with low  
371 (GROWING) and the other with high (STABLE) initial biomass. The GROWING NatCom expanded six times  
372 more than the STABLE community, reflective of the increased nutrient niche availability in GROWING.  
373 Three of the four tested inoculants (the three pseudomonads) indeed established better in the GROWING  
374 than the STABLE NatCom state. The effect was modest, potentially because the STABLE condition still  
375 permitted some growth of the resident community but nonetheless validates the principle. The poor  
376 proliferation in soil of *E. coli* is likely due to its general inability to exploit soil ecological niches. By providing  
377 a selective nutrient niche (i.e., toluene) within the same background we achieved two orders of magnitude  
378 higher inoculant growth, demonstrating that niche (un)availability and competition control inoculant  
379 proliferation. The concept of a unique niche for inoculant growth has been understood for infant gut  
380 succession and can be exploited by symbiotic supplements<sup>36,37</sup>, whereas recent work (which employed a  
381 similar experimental system) also demonstrated how nutrient provision in the plant rhizosphere can build  
382 a specific inoculant niche<sup>38</sup>. Our results show it is applicable to soil microbiota interventions.

383

384 Although niche availability explained part of the inoculant's fates in the soil communities, we also  
385 investigated potential biological interactions, which have been considered by others as crucial for invader  
386 establishment<sup>5,7</sup>. Surprisingly, we found that growth of all four inoculants was decreased in paired co-  
387 cultures with randomized soil bacteria inside micro-agarose beads (Fig. 4), whereas growth of the soil  
388 partner on average was increased. Rather than substrate competition this effect is indicative of competitive  
389 facilitation, by which the inoculants lose productivity in facilitating the growth of the partner<sup>39</sup>. Thus, our  
390 findings suggest that by facilitating the growth of other soil bacteria inoculants diminish their own  
391 population expansion. We illustrated the extent of this phenomenon more clearly for the case of thriving  
392 *P. veronii* in soil exposed to toluene, which led to measurable increases of selective gene expression for  
393 aromatic compound metabolism in resident bacteria (Fig. 6). More generally, the metabolism of most  
394 bacteria results in leaking metabolites<sup>40</sup> that can become more broadly accessible to other cells in their  
395 vicinity, thereby benefiting their maintenance or growth and contributing to community diversity<sup>41</sup>.

396

397 Our results demonstrated the importance of niche availability for inoculant proliferation and highlighted  
398 the consequences of facilitative metabolism on competitive outcomes. From the perspective of  
399 microbiome engineering or interventions it is important to learn the degrees of available control of a  
400 system such that intended taxonomic and/or functional changes can be achieved. This control may range  
401 from exploiting inherent and temporal available niches for growth to establishing selective (temporal)  
402 niches for one or more inoculants to thrive and exert their functionalities. Engineering soil microbiomes is  
403 particularly complicated by their inherent biotic and abiotic complexity and spatial heterogeneity, which  
404 cannot be easily tuned by process parameters like, for example, in the engineered infrastructure of a  
405 wastewater treatment plant. However, our results suggest that niche engineering is a potentially  
406 exploitable mechanism for inoculant establishment. Engineered niches need not necessarily to consist of  
407 selective carbon compounds but, potentially, could also be generated in the form of spatial niches or other  
408 limiting nutrients. *Inter alia*, our results also reflect a realistic bioremediation scenario where an inoculated  
409 bioremediation agent thrives thanks to the selective niche provided by a contaminating compound.  
410 Degradation of the contaminant can then simultaneously favor growth of other soil members, leading to  
411 the subsequent decline of the inoculant but restoration of the microbiome.

412

## 413 **MATERIAL AND METHODS**

414

### 415 **Soil inoculant strains**

416 Four strains were selected as inoculants for growth and interaction studies with soil communities: *P. veronii*  
417 1YdBTEX2, a toluene, benzene, *m*- and *p*-xylene degrading bacterium isolated from contaminated soil <sup>21</sup>;  
418 *P. putida* F1, a benzene-, ethylbenzene- and toluene-degrading bacterium from a polluted creek <sup>22</sup>; *P.*  
419 *protegens* CHA0, a bacterium with plant-growth promoting character as a result of secondary metabolite  
420 production <sup>42</sup>; and (motile) *E. coli* MG1655 (obtained from the *E. coli* Genetic stock center Yale; CGSC#8237)  
421 <sup>43</sup>, as a typical non-soil dwelling bacterium. Variants of the four strains that constitutively express mCherry  
422 fluorescent protein were used. *P. veronii* 1YdBTEX2 and *P. protegens* CHA0 were tagged with mCherry  
423 (expressed under control of the P<sub>tac</sub> promoter) using a mini-Tn7 delivery system <sup>44</sup>. *P. putida* F1 was tagged  
424 with the same P<sub>tac</sub>-mCherry cassette, cloned into and delivered by mini-Tn5 suicide vector pBAM <sup>45</sup>. *E. coli*  
425 MG1655 was tagged with the same P<sub>tac</sub>-mCherry cassette but on plasmid pME6012 <sup>46</sup>.

426

### 427 **Culturing of NatCom soil microbial communities in soil microcosms**

428 Inoculant proliferation was tested in sterile soil microcosms, with or without precolonization by resident  
429 soil microbiota. The microcosms were prepared according to the procedure described in Čaušević et al. <sup>25</sup>,  
430 by complementing dried, double-sieved, and twice autoclaved silt (obtained particle size 0.5–3 mm), with  
431 soil organic solution to a final gravimetric water content of 10%. Soil organic solution was water extracted

432 from top-soil (1–5 cm, Dorigny forest at the University of Lausanne campus). Equal volumes of soil and tap  
433 water were mixed and autoclaved for 1 h and left to cool overnight. After decanting, the liquid fraction was  
434 further centrifuged and filtered (<0.22  $\mu\text{m}$ ) to remove soil and plant debris. The resulting solution was  
435 autoclaved a second time to ensure complete sterility. Our soil microbiota was sourced from previously  
436 grown top soil microbial communities (NatCom) in the same type of reconstituted sterile soil material <sup>25</sup>,  
437 which had been stored at room temperature (23 °C) for 1.5 years.

438  
439 Soil microbiota were revived by transferring 11 g of the stored NatCom soil into 80 g sterile soil material  
440 reconstituted with 9 ml forest soil extract in a 500 ml capped Schott glass bottle (Fig. 1A, 50 replicates).  
441 Five microcosms were selected randomly for the Phase 1 analysis and the rest of the microcosm material  
442 was kept for Phase 2. The microcosms were periodically mixed on a bottle roller and incubated at room  
443 temperature (23 °C) in the dark for 28 days to allow the growth, dispersal, and colonization of the NatCom  
444 throughout the soil material. The five selected microcosms were sampled at regular intervals to assess taxa  
445 composition by amplicon sequencing and cell density by flow cytometry (see below). After 28 days, the  
446 content of all inoculated microcosms was mixed and divided into two new sets of 28 microcosms. In one  
447 set (the STABLE state) the pooled and colonized soil material (100 g) was directly transferred to new,  
448 sterilized, and empty Schott bottles without any new addition of nutrients. In the second set (the GROWING  
449 state) the colonized material (11 g) was mixed with 80 g freshly sterilized soil matrix and 9 ml forest soil  
450 extract in a new bottle. This soil-to-soil dilution allowed a new phase of active community growth.

451

#### 452 **Introduction of inoculants in soil microcosms**

453 For inoculation into soil microcosms all pseudomonads were grown individually from frozen glycerol stocks  
454 in Lysogeny-Broth (LB, BD Difco) supplemented with 25  $\mu\text{g mL}^{-1}$  of gentamicin (30 °C) and *E. coli* was grown  
455 at 37 °C in LB with 25  $\mu\text{g mL}^{-1}$  of tetracycline, to maintain the fluorescent marker. After 16 h culturing, cells  
456 were harvested by centrifugation, washed, and subsequently diluted in type 21 C minimal medium (MM;  
457 <sup>47</sup>) with 0.1 mM succinate to obtain a concentration of  $10^7$  cells  $\text{mL}^{-1}$ . Four sets of four replicates each of  
458 STABLE or GROWING microcosms (see above) were then inoculated with either of the four strains to  
459 achieve a starting inoculant cell density of  $10^5$  cells  $\text{g}^{-1}$  of soil, while one set of four remained unamended  
460 to verify sterility. Inoculants were inoculated individually (ALONE) into sterile soil microcosms (4 replicates  
461 each, same microcosm material). A final two sets of four microcosms (with or without NatCom in either  
462 the STABLE or GROWING state) were amended with *P. veronii* and toluene or with toluene alone (see  
463 below). Following inoculation the microcosms were mixed on a bottle roller and incubated at 23 °C.

464

#### 465 **Addition of toluene to microcosms**

466 Toluene (Fluka Analytical) was introduced to the microcosms in the gas phase via 0.5 ml pure toluene held  
467 in a heat-sealed 1-ml micropipette tip, which was placed inside a sealed 5-ml tip for additional stability,

468 carefully placed inside the microcosms. At each mixing and sampling step, toluene tips were removed from  
469 microcosms using sterile tweezers, the level of toluene was checked and replenished to 0.5 ml, if necessary,  
470 after which the tips were replaced once the content of microcosm was mixed.

471

#### 472 **Extraction of cells from soil microcosms**

473 Soil community size and composition was quantified using cells washed from the soil matrix at each time  
474 point. Microcosm material (10 g) was sampled using Sterileware sampling spatulas (SP Bel-Art) and  
475 transferred to a 50 ml capped Greiner tube, after which 10 ml sterile tetrasodium-pyrophosphate  
476 decahydrate (TSP) solution (2 g l<sup>-1</sup>, pH 7.5, Sigma-Aldrich) was added and the mixture vortexed for 2 min  
477 at maximum speed on a Vortex-Genie 2 (Scientific Industries, Inc.). Debris was allowed to settle for 2 min  
478 and the supernatant (cell suspension) was transferred to a new tube. This suspension was then used for  
479 cell enumeration by flow cytometry or colony forming unit counting, DNA isolation, and amplicon  
480 sequencing.

481

#### 482 **Flow cytometry cell enumeration**

483 A portion of the cell suspension (see above) was passed through a 40 µm nylon strainer (Falcon) to remove  
484 particulate material. Two 100-µl aliquots of filtrate were then mixed with equal volumes of 4 M sodium  
485 azide solution (Sigma-Aldrich) to fix the cells. Fixed samples were kept at 4 °C until processing with flow  
486 cytometry (within 1 week). Before flow cytometry measurement, one fixed sample was stained with SYBR  
487 Green I for 15 min in the dark (Invitrogen, following manufacturer's instructions) whereas the other  
488 remained unstained, allowing the estimation of background fluorescent particle content. Stained and non-  
489 stained suspensions (10 µl) were aspirated on a CytoFLEX Flow Cytometer (Beckman Coulter) at the slow flow  
490 rate (10 µl min<sup>-1</sup>). Phase 1 non-inoculated microcosms were used as controls for background noise coming  
491 from soil, which was subtracted from total counts of treated microcosms. The inoculants were detected  
492 and gated based on their mCherry tag (ECD-H signal) signal in the non-SYBR Green I-stained sample series.

493

#### 494 **Colony forming unit counting**

495 A 100-µl aliquot of soil cell suspension was serially diluted using TSP solution and 10 µl droplets (four  
496 technical replicates) of each dilution (from 10<sup>0</sup> to 10<sup>-7</sup>) were deposited on R2A plates (DSMZ GmbH). The  
497 plates were left to dry for 10 min and then incubated at 23 °C in the dark. Colonies were counted after 3  
498 days of growth using a stereo microscope (Nikon SMZ25), and the corresponding community number of  
499 colony forming units (CFU) g<sup>-1</sup> soil was calculated from the cell extraction procedure and its dilutions.

500

#### 501 **Amplicon sequencing**

502 The remaining cell suspension (9 ml) was centrifuged in a swing-out rotor (Eppendorf A-4-62 Swing Bucket  
503 Rotor) at 4000 × g for 7 min to harvest the cells. The supernatant was discarded and cell pellets were stored

504 at  $-80^{\circ}\text{C}$ . DNA was subsequently extracted from thawed cell pellets using a DNeasy PowerSoil Pro DNA  
505 Isolation Kit (Qiagen, as per instructions by the supplier). Final yields were quantified using a Qubit dsDNA  
506 BR Assay Kit (Invitrogen), and the purified DNA solution was stored at  $-20^{\circ}\text{C}$  until library construction. Each  
507 sample (10 ng DNA input) was then used to amplify the V3–V4 variable region of the 16S rRNA gene,  
508 following the protocol by Illumina (16S Metagenomic Sequencing Library Protocol,  
509 [https://support.illumina.com/documents/... documentation/chemistry\\_documentation/16s/16s-](https://support.illumina.com/documents/...documentation/chemistry_documentation/16s/16s-metagenomic-library-prep-guide-15044223b.pdf)  
510 [metagenomic-library-prep-guide-15044223b.pdf](https://support.illumina.com/documents/...documentation/chemistry_documentation/16s/16s-metagenomic-library-prep-guide-15044223b.pdf)).

511 Samples were indexed by using the Nextera XT Index kit (v2, sets A and B, Illumina) after which the DNA  
512 was again purified, pooled, and sequenced using a MiSeq v3 paired-end protocol (Lausanne Genomic  
513 Technologies Facility). Raw reads were analyzed using the Qiime2 platform on UNIX (version 2021.8)<sup>48</sup>,  
514 and amplified sequence variants (ASVs) were attributed to known taxa at 99% identity (operational  
515 taxonomic units, OTU) by comparison to the SILVA database (version 132).

516

### 517 **Paired inoculant-soil taxa growth assays in encapsulating agarose beads**

518 Potential growth effects between inoculants and soil taxa were tested using random pairs of single cells  
519 encapsulated within 40–70  $\mu\text{m}$  diameter polydisperse agarose beads<sup>24</sup>. Inoculants were precultured as  
520 follows. *P. veronii* and *P. putida* were grown on MM agar with toluene as sole carbon source provided  
521 through the vapour phase in a desiccator, as described previously<sup>49</sup>. A single colony grown after 48 h  
522 incubation at  $30^{\circ}\text{C}$  was subsequently inoculated into 10 ml MM with 5 mM succinate as the sole carbon  
523 source and cultured for 24 h. *P. protegens* and *E. coli* colonies were cultured as described above on selective  
524 nutrient agar plates supplemented with  $25\ \mu\text{g ml}^{-1}$  of gentamicin or  $25\ \mu\text{g ml}^{-1}$  of tetracycline, respectively,  
525 and then transferred to liquid MM with 5 mM succinate. After 24 h growth, the cells were harvested from  
526 their precultures by centrifugation and resuspended in 10 ml MM. Cell suspensions were counted by flow  
527 cytometry and diluted to  $2\times 10^7$ – $10^8$  cells  $\text{ml}^{-1}$  for the bead encapsulation process. Soil microorganisms  
528 were washed and purified for each encapsulation experiment from four 200 g samples of fresh soil  
529 (characteristics and location as described previously<sup>24</sup>) using a similar procedure as described above for  
530 the NatComs. Purified cells were counted by flow cytometry and diluted in MM to  $1\times 10^8$  cells  $\text{ml}^{-1}$  before  
531 encapsulation. Each of the inoculant or washed soil cell suspensions alone, or inoculant mixed in 1:1  
532 volumetric ratio with the soil cell suspension, were then mixed with liquid low-melting agarose solution  
533 ( $37^{\circ}\text{C}$ ) to produce 40–70  $\mu\text{m}$  diameter agarose beads with a Poisson-average of two founder cells at start,  
534 using the procedure described previously<sup>24</sup>. Per condition and type of inoculant, two batches of cell-  
535 encapsulated beads were prepared in parallel, which were pooled and then split in three replicate tubes  
536 each containing 1 ml bead solution. The encapsulation procedure produced  $1.2\times 10^6$  beads per ml, with an  
537 estimated effective ‘bead’ volume of 10% of the total volume of the liquid phase in the incubations.

538

### 539 **Culture conditions for bead-encapsulated cell pairs**

540 Three different carbon source regimes were imposed on bead-encapsulated cells: toluene, mixed carbon  
541 substrates, or soil extract. Toluene was used as an example of an inoculant-selective substrate (for *P.*  
542 *veronii* and *P. putida*) and was provided by partitioning from an oil phase. We diluted pure toluene 1000×  
543 in 2,2',4,4',6,8,8'-heptamethylnonane (Sigma Aldrich) and added 0.2 ml of this solution to each vial with 1  
544 ml bead suspension. A further 4 ml of MM was added to the vials for the incubation. Mixed carbon  
545 substrates (Mixed-C), and soil extract were used as diverse substrates for all inoculants and soil microbes.  
546 Mixed-C solution was prepared by dissolving 16 individual compounds (Table S1) in milliQ-water (Siemens  
547 Labostar) in equimolar concentration such that the total carbon concentration of the solution reached 10  
548 mM-C. These compounds have been used previously as soil representative substrates<sup>50</sup>. In the bead  
549 incubations, the Mixed-C was diluted to 0.1 mM-C final concentration in MM (5 ml total volume per vial)  
550 to avoid excessive growth of microcolonies inside the beads, which could lead to cell escape and their  
551 proliferation outside the beads.

552 Soil extract for agarose beads was prepared as follows. A quantity of 100 g soil (same origin as used for the  
553 soil community cell suspension<sup>24</sup>) was mixed with 200 ml 70 °C milliQ-water in a 250 ml Erlenmeyer flask  
554 and swirled on a rotatory platform for 15 min after which it was subjected to 10 min sonication in an  
555 ultrasonic bath (Telesonic AG, Switzerland). Sand particles were sedimented and the supernatant was  
556 decanted and passed through a 0.22 µm vacuum filter unit (Corning Inc.). The resulting soil extract (4 ml)  
557 was added directly to the 1 ml bead suspension in the vials. Triplicate vials per treatment and per inoculant-  
558 mixture were incubated at 25 °C with rotary shaking at 110 rpm to prevent sticking of the beads but avoid  
559 shearing damage.

560

#### 561 **Sampling and analysis of cell growth in agarose beads**

562 Encapsulated cell mixtures were sampled at regular time intervals (0, 6, 24, 48 and 72 h). For this, 10 µl of  
563 bead suspension was removed from the vials. Cells and microcolonies in the beads were stained with SYTO-  
564 9 solution and imaged with epifluorescence microscopy, as described previously<sup>24</sup>. Microcolony growth  
565 was quantified using a custom MATLAB (v. 2021b) image processing routine that segmented beads and  
566 microcolonies inside beads<sup>51</sup>. Inoculant cell colonies were differentiated from soil cells based on having  
567 both mCherry and SYTO-9 fluorescence, whereas soil cells displayed only SYTO-9 fluorescence. Growth was  
568 calculated as the product of SYTO-9 fluorescence area and mean fluorescence intensity for each detected  
569 microcolony<sup>24</sup>. Beads containing exactly one inoculant and one soil cell microcolony were selected to plot  
570 paired productivities. Productivities were compared to simulations (n = 5) of the expected paired  
571 productivity without any assumed interaction from the (subsampling) observed growth in encapsulated  
572 beads of either the inoculant or the soil cells alone. Differences among observed and expected paired  
573 productivities were evaluated from the sums across three regions as indicated in Figure 4C in an unpaired  
574 t-test.

575

## 576 **Metatranscriptomic analysis**

577 To better understand the impact of adding an inoculant and/or toluene on the native soil community we  
578 took advantage of previously conducted inoculation experiments of *P. veronii* in a variety of soil types from  
579 which total RNA had been purified<sup>28</sup>. These consisted of two uncontaminated soils (Clay and Silt), and one  
580 contaminated soil from a former gasification site named *Jonction*. Soils had been exposed or not to toluene  
581 and inoculated with *P. veronii*. We expected a high background of mono-aromatic compound degrading  
582 resident bacteria in *Jonction* because of its long-term contamination and, thus, more functional diversity  
583 in transcripts from aromatic-degradation pathways (Fig. S6 and S7). Soil microcosms had been sampled in  
584 an 'early' or a 'late' state (Fig. 6A) (the exact timing roughly depending on observed growth of the inoculant  
585 population)<sup>28</sup>. Total purified RNA from the samples was depleted for bacterial ribosomal RNAs, reverse-  
586 transcribed, indexed, and sequenced on Illumina HiSeq 2500 or NovaSeq at the Lausanne Genomic  
587 Technologies Facility following a previously described procedure<sup>28</sup>.

588  
589 Sequencing reads from all samples were quality controlled by BBMap (v.38.71), which removed adapters  
590 from the reads, removed reads that mapped to PhiX (a standard added to sequencing libraries) and  
591 discarded low-quality reads (trimq=14, maq=20, maxns=1, and minlength=45). Quality-controlled reads  
592 were merged using bbmerge.sh with a minimum overlap of 16 bases, resulting in merged, unmerged  
593 paired, and single reads. The reads from metatranscriptomic samples were assembled into transcripts  
594 using the SPAdes assembler<sup>52</sup> (v3.15.2) in transcriptome mode. Gene sequences were predicted using  
595 Prodigal<sup>53</sup> (v2.6.3) with the parameters -c -q -m -p meta. Gene sequences from the GenBank entry of *P.*  
596 *veronii* (GCA\_900092355) were downloaded and clustered at 95% identity, keeping the longest sequence  
597 as representative using CD-HIT<sup>54</sup> (v4.8.1) with the parameters -c 0.95 -M 0 -G 0 -aS 0.9 -g 1 -r 1 -d 0. Gene  
598 sequences predicted from assembled transcripts were used to augment the *P. veronii* database using CD-  
599 HIT (cd-hit-est-2d -c 0.95 -M 0 -G 0 -aS 0.9 -g 1 -r 1 -d 0). Representative gene sequences were aligned  
600 against the KEGG database (release April.2022) using DIAMOND<sup>55</sup> (v2.0.15) and filtered to have a minimum  
601 query and subject coverage of 70%, requiring a bitScore of at least 50% of the maximum expected bitScore  
602 (referenced against itself).

603 The 145 metatranscriptome samples were then mapped to the 246,873 cluster representatives with BWA  
604<sup>56</sup> (v0.7.17-r1188; -a), and the resulting BAM files were filtered to retain only alignments with a percentage  
605 identity of  $\geq 95\%$  and  $\geq 45$  bases aligned. Transcript abundance was calculated by first counting inserts from  
606 best unique alignments and then, for ambiguously mapped inserts, adding fractional counts to the  
607 respective target genes in proportion to their unique insert abundances.

608

## 609 **Data processing and statistical analysis**

610 Data processing, analysis of community composition, and statistical analysis were done using GraphPad  
611 Prism (version 9.0.1) and R 4.0 (R Core Team, 2019) on RStudio (version 2022.2.3.492) using the following

612 packages: *phyloseq*<sup>57</sup>, *microbiome*<sup>58</sup>, *MicrobiotaProcess*, *ggplot2*<sup>59</sup>, *vegan*<sup>60</sup>, *biomformat*<sup>61</sup>, *tidyverse*<sup>62</sup>,  
613 *reshape2*<sup>63</sup>, *Biostrings*<sup>64</sup>, *PMCMRplus*<sup>65</sup>, *emmeans*<sup>66</sup>, and *RVAideMemoire*<sup>67</sup>. Chao1 values of Phase 1  
614 samples (Day 0 to Day 23, different replicates) were compared with a Wilcoxon test. Shannon values of  
615 Phase 1 samples were compared with a Kruskal-Wallis test and by pairwise comparisons using Dunn testing  
616 with Holm's p-value adjustment. Beta-diversity of Phase 1 community compositions (at species level) was  
617 analyzed using Unifrac distances with PCoA ordination (using *phyloseq* in R). Differences were analyzed  
618 using PERMANOVA (999 permutations) using the *adonis2* function, while data homogeneity was checked  
619 using *betadisper* function of the *vegan* package. Finally, pairwise differences between timepoints were  
620 investigated using *pairwise.perm.manova* from *RVAideMemoire* and p-values were adjusted using Holm's  
621 method. Phase 2 Chao1 and Shannon values of GROWING and STABLE were compared using two-way  
622 repeated measures ANOVA to investigate the effect of community state and time (only significant effects  
623 are shown). For both, *post hoc* testing was done with *t* tests and p-values were adjusted with Holm's  
624 method.

625

626 Flow cytometry data was imported using the function *fca\_readfcs*<sup>68</sup> and analyzed using custom MATLAB  
627 scripts (v. 2021b). Flow cytometry counts of GROWING and STABLE NatCom were compared using two-  
628 way repeated measures ranked ANOVA. Inoculant population sizes in conditions ALONE, GROWING, or  
629 STABLE (all time points together) were compared with a Kruskal-Wallis test followed by a *post hoc* Dunn  
630 test. The same test was used to evaluate the per inoculant differences in average population size and fold-  
631 increase. Differences in percentage of inoculant survival in GROWING or STABLE conditions were tested  
632 with a one-way ANOVA followed by Tukey's test. The effect of toluene on total community population size  
633 was examined with a Wilcoxon test (for GROWING and STABLE, separately). Changes in *P. veronii*  
634 population sizes upon introduction into toluene exposed microcosms were evaluated using Kruskal-Wallis  
635 testing with a *post hoc* Dunn test. All p-values from multiple pairwise comparisons were adjusted for  
636 multiple testing using Holm's p-value adjustment method.

637

638 The effect of inoculant or toluene on taxa abundances was evaluated separately per replicate (randomly  
639 paired between control and treatment) and per time point using log<sub>10</sub> transformed abundances.  
640 Theoretical values were inferred using a linear regression model, and taxa with abundances higher or lower  
641 than one log compared to expected value were classed as an enriched or depleted outlier, respectively.  
642 The total difference of each outlier to their expected value per condition was termed 'total outlier distance'  
643 and was subsequently calculated for each of the conditions (enriched and depleted taxa were quantified  
644 separately).

645 Microcolony productivity distributions in agarose beads were globally compared non-parametrically with  
646 the Fisher test (implemented in R 4.0) because of their non-normal nature. Productivities of paired

647 inoculant-soil cell taxon within the same bead were evaluated by comparing to expected *null* distributions  
648 using unpaired t-tests, as described above.

649 The main goal of the metatranscriptomic experiments with *P. veronii* in a variety of soil types was to  
650 characterize the response of the native soil community to the addition of inoculant and/or toluene. For  
651 this, all transcripts assigned to the *P. veronii* genome were removed from the metatranscriptomic data  
652 leaving only transcripts assigned to the native soil microbial community. Length-normalized transcript  
653 abundances were then calculated by dividing the total insert counts by the length of the respective gene  
654 in kilobases. Transcript abundances per kilobase (TPK) were further converted into transcripts per kilobase  
655 million (TPM) as follows<sup>69</sup>. The sum of TPK values in a sample was divided by  $10^3$ , and the result was used  
656 as a scaling factor for each sample. Each individual TPK value was divided by the respective scaling factor  
657 to produce the TPM values. Genes assigned to metabolic pathways associated to toluene and aromatic  
658 compound degradation were selected based on a pre-defined list of KEGG identifiers (Table S2).  
659 Representative genes for some of the highly expressed pathways were taxonomically annotated by  
660 comparing to publicly available genomes. All genes from bacterial and archaeal genomes annotated to the  
661 corresponding KEGG orthologs (K15765, K16242, K00446, K07104, K04073, K10216, K05549, K16319) in  
662 IMG/M (Integrated microbial genomes and microbiomes: <https://img.jgi.doe.gov/>) were downloaded and  
663 used as a reference database to annotate all genes from the metatranscriptomics data with the same KEGG  
664 ortholog assignment. Global sequence alignment was performed with *vsearch* (v2.15) and genes were  
665 taxonomically assigned to the best hit (i.e., highest sequence identity; hits with a sequence identity below  
666 70% were discarded). Genes assigned to ribosomal proteins were identified by a text-based query of the  
667 gene annotations. The relative abundance (proportion of TPM values) of all transcripts assigned to  
668 ribosomal proteins was used as an index of the native community growth rate. Indeed, levels of ribosomal  
669 protein transcripts have been shown previously to be well correlated with growth rate in yeast<sup>70</sup>, Bacteria  
670<sup>71</sup> and Archaea<sup>72</sup> and have been proposed and used as a metric for assessing in situ growth rates from  
671 metatranscriptomic data<sup>73</sup>. All statistical test results are reported in S1 Dataset.

672

### 673 **Data accessibility**

674 Raw metatranscriptomic datasets of *P. veronii* inoculation into Clay, Silt, and Junction are available from  
675 Bioproject accession number PRJNA682712, and datasets depleted from *P. veronii* reads itself can be  
676 accessed from the European Nucleotide Archive (accession numbers, ERS2210331 to ERS2210346). The  
677 raw 16S rRNA gene V3-V4 amplicon sequences for the random-paired inoculant-bead communities  
678 incubated under different substrate conditions can be accessed from the Short Read Archives under  
679 BioProject ID PRJNA661487. Finally, NatCom community profiling by 16S rRNA gene amplicon analysis is  
680 accessible through BioProject ID xxx.

681

### 682 **Acknowledgements**

683 The authors thank Christoph Keel for providing us with *P. protegens* CHA0 and its tagged derivative. We  
684 are very grateful for critical reading of the manuscript by Phil Gwyther.

685

686 **Funding**

687 This work was supported by the Swiss National Science Foundation (Sinergia program, grant CRSII5  
688 189919/1), SystemsX.ch grant 2013/158 (Design and Systems Biology of Functional Microbial Landscapes  
689 “MicroScapesX”), and by the National Centre in Competence Research (NCCR) in Microbiomes (grant  
690 number 180575).

691 **References**

692

693

694

- 695 1. Banerjee, S. & van der Heijden, M. G. A. Soil microbiomes and one health. *Nat Rev Microbiol* **21**, 6-20  
696 (2023).
- 697 2. Caballero-Flores, G., Pickard, J. M. & Nunez, G. Microbiota-mediated colonization resistance:  
698 mechanisms and regulation. *Nat Rev Microbiol* **21**, 347-360 (2023).
- 699 3. Vonaesch, P., Anderson, M. & Sansonetti, P. J. Pathogens, microbiome and the host: emergence of the  
700 ecological Koch's postulates. *FEMS Microbiol Rev* **42**, 273-292 (2018).
- 701 4. Handa, I. T. *et al.* Consequences of biodiversity loss for litter decomposition across biomes. *Nature* **509**,  
702 218-221 (2014).
- 703 5. Mallon, C. A., van Elsas, J. D. & Salles, J. F. Microbial invasions: the process, patterns, and mechanisms.  
704 *Trends Microbiol* **23**, 719-729 (2015).
- 705 6. Paruch, L., Paruch, A. M., Eiken, H. G. & Sorheim, R. Faecal pollution affects abundance and diversity of  
706 aquatic microbial community in anthropo-zoogenically influenced lotic ecosystems. *Sci Rep* **9**, 19469  
707 (2019).
- 708 7. Albright, M. B. N., Louca, S., Winkler, D. E., Feeser, K. L., Haig, S. J., Whiteson, K. L., Emerson, J. B. &  
709 Dunbar, J. Solutions in microbiome engineering: prioritizing barriers to organism establishment. *ISME J*  
710 **16**, 331-338 (2022).
- 711 8. Cycon, M., Mroziak, A. & Piotrowska-Seget, Z. Bioaugmentation as a strategy for the remediation of  
712 pesticide-polluted soil: A review. *Chemosphere* **172**, 52-71 (2017).
- 713 9. Atashgahi, S., Sanchez-Andrea, I., Heipieper, H. J., van der Meer, J. R., Stams, A. J. M. & Smidt, H.  
714 Prospects for harnessing biocide resistance for bioremediation and detoxification. *Science* **360**, 743-  
715 746 (2018).
- 716 10. Saad, M. M., Eida, A. A. & Hirt, H. Tailoring plant-associated microbial inoculants in agriculture: a  
717 roadmap for successful application. *J Exp Bot* **71**, 3878-3901 (2020).
- 718 11. Tabassum, B., Khan, A., Tariq, M., Ramzan, M., Khan, M. S. I., Shahid, N. & Aaliya, K. Bottlenecks in  
719 commercialisation and future prospects of PGPR. *Appl Soil Ecol* **121**, 102-117 (2017).
- 720 12. Kaminsky, L. M., Trexler, R. V., Malik, R. J., Hockett, K. L. & Bell, T. H. The Inherent Conflicts in Developing  
721 Soil Microbial Inoculants. *Trends Biotechnol* **37**, 140-151 (2019).
- 722 13. El Fantroussi, S. & Agathos, S. N. Is bioaugmentation a feasible strategy for pollutant removal and site  
723 remediation? *Curr Opin Microbiol* **8**, 268-275 (2005).
- 724 14. Jones, M. L., Rivett, D. W., Pascual-Garcia, A. & Bell, T. Relationships between community composition,  
725 productivity and invasion resistance in semi-natural bacterial microcosms. *Elife* **10**, e71811 (2021).
- 726 15. Mallon, C. A., Poly, F., Le Roux, X., Marring, I., van Elsas, J. D. & Salles, J. F. Resource pulses can alleviate  
727 the biodiversity-invasion relationship in soil microbial communities. *Ecology* **96**, 915-926 (2015).
- 728 16. San Roman, M. & Wagner, A. Diversity begets diversity during community assembly until ecological  
729 limits impose a diversity ceiling. *Mol Ecol* **30**, 5874-5887 (2021).
- 730 17. Amor, D. R., Ratzke, C. & Gore, J. Transient invaders can induce shifts between alternative stable states  
731 of microbial communities. *Sci Adv* **6**, eaay8676 (2020).
- 732 18. Otto, S., Harms, H. & Wick, L. Y. Effects of predation and dispersal on bacterial abundance and  
733 contaminant biodegradation. *FEMS Microbiol Ecol* **93**, fiw241 (2017).
- 734 19. van Veen, J. A., van Overbeek, L. S. & van Elsas, J. D. Fate and activity of microorganisms introduced  
735 into soil. *Microbiol Mol Biol Rev* **61**, 121-135 (1997).
- 736 20. Burz, S. D. *et al.* From microbiome composition to functional engineering, one step at a time. *Microbiol*  
737 *Mol Biol Rev* **in press** (2023).
- 738 21. Junca, H. & Pieper, D. H. Functional gene diversity analysis in BTEX contaminated soils by means of PCR-  
739 SSCP DNA fingerprinting: comparative diversity assessment against bacterial isolates and PCR-DNA  
740 clone libraries. *Environ Microbiol* **6**, 95-110 (2004).
- 741 22. Zylstra, G. J., McCombie, W. R., Gibson, D. T. & Finette, B. A. Toluene degradation by *Pseudomonas*  
742 *putida* F1: genetic organization of the *tod* operon. *Appl Environ Microbiol* **54**, 1498-1503 (1988).
- 743 23. Natsch, A., Keel, C., Hebecker, N., Laasik, E. & Defago, G. Influence of biocontrol strain *Pseudomonas*  
744 *fluorescens* CHA0 and its antibiotic overproducing derivative on the diversity of resident root colonizing  
745 pseudomonads. *FEMS Microbiol Ecol* **23**, 341-352 (1997).

- 746 24. Dubey, M., Hadadi, N., Pelet, S., Carraro, N., Johnson, D. R. & van der Meer, J. R. Environmental  
747 connectivity controls diversity in soil microbial communities. *Commun Biol* **4**, 492 (2021).
- 748 25. Čaušević, S., Tackmann, J., Sentchilo, V., von Mering, C. & van der Meer, J. R. Reproducible propagation  
749 of species-rich soil bacterial communities suggests robust underlying deterministic principles of  
750 community formation. *mSystems*, e0016022 (2022).
- 751 26. Bickel, S. & Or, D. Soil bacterial diversity mediated by microscale aqueous-phase processes across  
752 biomes. *Nat Commun* **11**, 116 (2020).
- 753 27. Raynaud, X. & Nunan, N. Spatial ecology of bacteria at the microscale in soil. *PLoS One* **9**, e87217 (2014).
- 754 28. Morales, M., Sentchilo, V., Hadadi, N. & van der Meer, J. R. Genome-wide gene expression changes of  
755 *Pseudomonas veronii* 1YdBTEX2 during bioaugmentation in polluted soils. *Environ Microbiome* **16**, 8  
756 (2021).
- 757 29. Corteselli, E. M., Aitken, M. D. & Singleton, D. R. Description of *Immundisolibacter cernigliae* gen. nov.,  
758 sp. nov., a high-molecular-weight polycyclic aromatic hydrocarbon-degrading bacterium within the  
759 class Gammaproteobacteria, and proposal of Immundisolibacterales ord. nov. and  
760 Immundisolibacteraceae fam. nov. *Int J Syst Evol Microbiol* **67**, 925-931 (2017).
- 761 30. Corteselli, E. M., Aitken, M. D. & Singleton, D. R. *Rugosibacter aromaticivorans* gen. nov., sp. nov., a  
762 bacterium within the family Rhodocyclaceae, isolated from contaminated soil, capable of degrading  
763 aromatic compounds. *Int J Syst Evol Microbiol* **67**, 311-318 (2017).
- 764 31. van Elsas, J. D., Chiurazzi, M., Mallon, C. A., Elhottova, D., Kristufek, V. & Salles, J. F. Microbial diversity  
765 determines the invasion of soil by a bacterial pathogen. *Proc Natl Acad Sci U S A* **109**, 1159-1164 (2012).
- 766 32. Vivant, A. L., Garmyn, D., Maron, P. A., Nowak, V. & Piveteau, P. Microbial diversity and structure are  
767 drivers of the biological barrier effect against *Listeria monocytogenes* in soil. *PLoS One* **8**, e76991 (2013).
- 768 33. De Roy, K., Marzorati, M., Negroni, A., Thas, O., Balloi, A., Fava, F., Verstraete, W., Daffonchio, D. &  
769 Boon, N. Environmental conditions and community evenness determine the outcome of biological  
770 invasion. *Nat Commun* **4**, 1383 (2013).
- 771 34. Hodgson, D. J., Rainey, P. B. & Buckling, A. Mechanisms linking diversity, productivity and invasibility in  
772 experimental bacterial communities. *Proc Biol Sci* **269**, 2277-2283 (2002).
- 773 35. Eisenhauer, N., Schultz, W., Scheu, S. & Jousset, A. Niche dimensionality links biodiversity and  
774 invasibility of microbial communities. *Functional Ecology* **27**, 282-288 (2013).
- 775 36. Button, J. E. *et al.* Dosing a synbiotic of human milk oligosaccharides and *B. infantis* leads to reversible  
776 engraftment in healthy adult microbiomes without antibiotics. *Cell Host Microbe* **30**, 712-725 e717  
777 (2022).
- 778 37. Vatanen, T. *et al.* A distinct clade of *Bifidobacterium longum* in the gut of Bangladeshi children thrives  
779 during weaning. *Cell* **185**, 4280-4297 e4212 (2022).
- 780 38. Garrido-Sanz, D., Causevic, S., Vacheron, J., Heiman, C. M., Sentchilo, V., van der Meer, J. R. & Keel, C.  
781 Changes in structure and assembly of a species-rich soil natural community with contrasting nutrient  
782 availability upon establishment of a plant-beneficial *Pseudomonas* in the wheat rhizosphere.  
783 *Microbiome* **11**, 214 (2023).
- 784 39. Guex, I., Mazza, C., Dubey, M., Batsch, M., Li, R. & van der Meer, J. R. Regulated bacterial interaction  
785 networks: A mathematical framework to describe competitive growth under inclusion of metabolite  
786 cross-feeding. *PLoS Comput Biol* **19**, e1011402 (2023).
- 787 40. Lopez, J. G. & Wingreen, N. S. Noisy metabolism can promote microbial cross-feeding. *Elife* **11**, e70694  
788 (2022).
- 789 41. Yamagishi, J. F., Saito, N. & Kaneko, K. Adaptation of metabolite leakiness leads to symbiotic chemical  
790 exchange and to a resilient microbial ecosystem. *PLoS Comput Biol* **17**, e1009143 (2021).
- 791 42. Jousset, A., Schuldes, J., Keel, C., Maurhofer, M., Daniel, R., Scheu, S. & Thuermer, A. Full-genome  
792 sequence of the plant growth-promoting bacterium *Pseudomonas protegens* CHA0. *Genome Announc*  
793 **2** (2014).
- 794 43. Lawrence, J. G. & Ochman, H. Molecular archaeology of the *Escherichia coli* genome. *Proc Natl Acad Sci*  
795 *U S A* **95**, 9413-9417 (1998).
- 796 44. Rochat, L., Pechy-Tarr, M., Baehler, E., Maurhofer, M. & Keel, C. Combination of fluorescent reporters  
797 for simultaneous monitoring of root colonization and antifungal gene expression by a biocontrol  
798 pseudomonad on cereals with flow cytometry. *Mol Plant Microbe Interact* **23**, 949-961 (2010).
- 799 45. Martinez-Garcia, E., Calles, B., Arevalo-Rodriguez, M. & de Lorenzo, V. pBAM1: an all-synthetic genetic  
800 tool for analysis and construction of complex bacterial phenotypes. *BMC Microbiol* **11**, 38 (2011).

- 801 46. Heeb, S., Itoh, Y., Nishijyo, T., Schnider, U., Keel, C., Wade, J. & Haas, D. Small, stable shuttle vectors  
802 based on the minimal pVS1 replicon for use in gram-negative, plant-associated bacteria *Mol Plant*  
803 *Microbe Interact* **13**, 232-237 (2000).
- 804 47. Gerhardt, P., Murray, R. G. E., Costilow, R. N., Nester, E. W., Wood, W. A., Krieg, N. R. & Phillips, G. B.  
805 (American Society for Microbiology, Washington, D.C., 1981).
- 806 48. Bolyen, E. *et al.* Reproducible, interactive, scalable and extensible microbiome data science using QIIME  
807 2. *Nat Biotechnol* **37**, 852-857 (2019).
- 808 49. Morales, M. *et al.* The genome of the toluene-degrading *Pseudomonas veronii* strain 1YdBTEX2 and its  
809 differential gene expression in contaminated sand. *PLoS One* **11**, e0165850 (2016).
- 810 50. Celiker, H. & Gore, J. Clustering in community structure across replicate ecosystems following a long-  
811 term bacterial evolution experiment. *Nat Commun* **5**, 4643 (2014).
- 812 51. Hadadi, N. & van der Meer, J. R. (Zenodo, 2021).
- 813 52. Nurk, S., Meleshko, D., Korobeynikov, A. & Pevzner, P. A. metaSPAdes: a new versatile metagenomic  
814 assembler. *Genome Res* **27**, 824-834 (2017).
- 815 53. Hyatt, D., Chen, G. L., Locascio, P. F., Land, M. L., Larimer, F. W. & Hauser, L. J. Prodigal: prokaryotic  
816 gene recognition and translation initiation site identification. *BMC Bioinformatics* **11**, 119 (2010).
- 817 54. Fu, L., Niu, B., Zhu, Z., Wu, S. & Li, W. CD-HIT: accelerated for clustering the next-generation sequencing  
818 data. *Bioinformatics* **28**, 3150-3152 (2012).
- 819 55. Buchfink, B., Reuter, K. & Drost, H. G. Sensitive protein alignments at tree-of-life scale using DIAMOND.  
820 *Nat Methods* **18**, 366-368 (2021).
- 821 56. Li, H. & Durbin, R. Fast and accurate short read alignment with Burrows-Wheeler transform.  
822 *Bioinformatics* **25**, 1754-1760 (2009).
- 823 57. McMurdie, P. J. & Holmes, S. phyloseq: an R package for reproducible interactive analysis and graphics  
824 of microbiome census data. *PLoS One* **8**, e61217 (2013).
- 825 58. mia: Microbiome analysis v. R package version 1.9.18 (2023).
- 826 59. Wickham, H. ggplot2. *Wiley Interdisciplinary Reviews: Computational Statistics* **3**, 180-185 (2011).
- 827 60. vegan: Community Ecology Package v. R package version 2.6-5 (2023).
- 828 61. biomformat: An interface package for the BIOM file format (2022).
- 829 62. Wickham, H. *et al.* Welcome to the tidyverse. *Journal of Open Source Software* **4**, 1686 (2019).
- 830 63. Wickham, H. Reshaping data with the reshape package. *Journal of Statistical software* **21**, 1-20 (2007).
- 831 64. Biostrings: Efficient manipulation of biological strings. R package version 2.64.0 (2022).
- 832 65. PMCMRplus: calculate pairwise multiple comparisons of mean rank sums extended v. R package version  
833 1.4. 1 (2018).
- 834 66. Lenth, R., Singmann, H., Love, J., Buerkner, P. & Herve, M. Emmeans: estimated marginal means, aka  
835 least-squares means (Version 1.3. 4). *Emmeans Estim Marg Means Aka Least-Sq Means* [https://CRAN](https://CRAN.R-project.org/package=emmeans)  
836 *R-project.org/package=emmeans* (2019).
- 837 67. Hervé, M. RVAideMemoire: testing and plotting procedures for biostatistics. *R package version 09-69* **3**  
838 (2018).
- 839 68. fca\_readfcs (MATLAB Central File Exchange, 2023).
- 840 69. Wagner, G. P., Kin, K. & Lynch, V. J. Measurement of mRNA abundance using RNA-seq data: RPKM  
841 measure is inconsistent among samples. *Theory Biosci* **131**, 281-285 (2012).
- 842 70. Eisen, M. B., Spellman, P. T., Brown, P. O. & Botstein, D. Cluster analysis and display of genome-wide  
843 expression patterns. *Proc Natl Acad Sci U S A* **95**, 14863-14868 (1998).
- 844 71. Wei, Y., Lee, J. M., Richmond, C., Blattner, F. R., Rafalski, J. A. & LaRossa, R. A. High-density microarray-  
845 mediated gene expression profiling of *Escherichia coli*. *J Bacteriol* **183**, 545-556 (2001).
- 846 72. Hendrickson, E. L., Liu, Y., Rosas-Sandoval, G., Porat, I., Soll, D., Whitman, W. B. & Leigh, J. A. Global  
847 responses of *Methanococcus maripaludis* to specific nutrient limitations and growth rate. *J Bacteriol*  
848 **190**, 2198-2205 (2008).
- 849 73. Gifford, S. M., Sharma, S., Booth, M. & Moran, M. A. Expression patterns reveal niche diversification in  
850 a marine microbial assemblage. *ISME J* **7**, 281-298 (2013).
- 851
- 852

853



854

855

856

857

858 **Figure 1. Producing standardized soil microbial communities for testing inoculant niche availability. (A)**  
859 Experimental approach to obtain resident soil microbial communities (NatComs) in either a growing or  
860 stable state. In Phase 1, 1.5 year old, stored soil NatComs were revived by diluting material into fresh sterile  
861 soil microcosms and incubating for one month. After one month, pooled, revived NatComs were used for  
862 Phase 2, either directly (community condition 'STABLE') or diluted 1:10 (v/v) with fresh microcosm material  
863 (condition 'GROWING'). **(B)** Community growth flow cytometry (FCM) counts (left y-axis, cyan) and Chao1  
864 index values for richness at amplicon sequence variant (ASV) level during Phase 1 (right y-axis, purple line).  
865 Dots show individual replicate measurements. Replicates are the same for all time points (repeated  
866 measures) except for T<sub>0</sub>, which is a sample of the total pool used for Phase 1 inoculation. **(C)** Phyla relative  
867 abundance changes during Phase 1. Individual stacked bars per time point show biological replicate  
868 compositions. The most abundant phyla are indicated with Roman numerals and described in the legend.  
869 **(D)** Trend in community development during Phase 1 (from light blue to dark magenta along the gray  
870 dashed line) represented on PCoA ordination of Unifrac distances (ASV level). Ellipses group replicates at  
871 each time point. **(E)** Mean Phase 2 community cell densities over time (FCM counts; dots indicating  
872 individual biological replicates). *P*- and *F*-values refer to cell density differences between GROWING and  
873 STABLE NatCom sizes (two-way repeated measures ranked ANOVA, S1 Dataset). Inset plot shows repeated  
874 experiment for community growth during the first 30 h upon dilution 1:100 (v/v) with fresh microcosm  
875 material quantified using colony forming units (CFU) per g of soil (shades of gray represent biological  
876 replicates). **(F)** Chao1 richness at ASV level in GROWING (orange) and STABLE (blue) NatComs during Phase  
877 2. Boxplots show median and quartiles with individual values represented as black dots. Full *p*-values are  
878 indicated only if < 0.05 before or after *p*-value adjustment and otherwise considered non significant (n.s.).  
879 ANOVA refers to a repeated measures two-way test for the effect of community state and time interaction.  
880

881



882

883

884

885

886

887 **Figure 2. Dependence of inoculant establishment on the growing state of resident communities. (A)** Bars  
888 show mean inoculant (*P. putida*, *P. veronii*, *P. protegens*, or *E. coli*) population sizes at each time point in  
889 sterile microcosms (ALONE, gray) and microcosms with GROWING (orange) or STABLE NatComs (blue).  
890 Black circles indicate individual biological replicate values ( $n = 4$ ). Population sizes are expressed as FCM  
891 cell counts per g of soil. Gray lines in GROWING or STABLE subplots connect the mean total community size  
892 measurements in the same samples (vertical lines representing  $\pm$  one standard deviation of the mean). *P*-  
893 value of Kruskal-Wallis test is indicated on the left of each group of subplots. Dashed lines indicate the  
894 calculated inoculum population size. **(B)** Differences of inoculant population sizes in GROWING versus  
895 STABLE resident communities. Dots represent individual replicate inoculant population size measurements  
896 from GROWING or STABLE NatComs paired by the same incubation time point, and colored by inoculant  
897 from GROWING or STABLE series (purple for *P. putida* (Pp), pink for *P. protegens* (Pr), red for *P. veronii* (Pv),  
898 and orange for *E. coli* (Ec), and color gradients follow time points, as in the scale. The diagonal indicates the  
899 *null* hypothesis of no difference between inoculant survival in growing or steady-state communities. The  
900 number of dots above and below the diagonal is signalled on the plot as value *n*. **(C)** Average inoculant  
901 population size in GROWING (grey background) or STABLE NatComs during the entire experiment (i.e.,  
902 mean of all sampling time points, except  $T_0$ ). Boxplots show median, quartiles, and individual values; dot  
903 colors as in (B). *P*-values refer to differences among inoculants by separate Kruskal-Wallis testing for  
904 GROWING and STABLE NatComs. **(D)** As for (B), but for the maximum observed fold-difference of inoculant  
905 density compared to  $T_0$ . Dashed lines indicate a fold-difference of 1. *P*- and *F*-values refer to one-way  
906 ANOVA test results for difference among inoculants. **(E)** Percent inoculant survival after two months (as  
907 the ratio of inoculant population size after two months divided by the initial inoculum size). *P*-values as in  
908 (C).  
909



910  
911  
912  
913

914 **Figure 3. Effect of a toluene selective nutrient niche on growth and survival of *P. veronii* within resident**  
915 **soil communities. (A)** Community sizes over time in presence or absence of toluene but without inoculant.  
916 Dots show replicate FCM cell counts per g soil ( $n = 4$  separate microcosms) with lines connecting the mean  
917 values.  $P$ -values result from Wilcoxon signed rank testing, comparing the effect of toluene on the total sizes  
918 of either GROWING or STABLE communities. **(B)** *P. veronii* population development within GROWING or  
919 STABLE NatCom exposed to toluene (shades of pink) or not (shades of green). Population data from *P.*  
920 *veronii* without toluene are reproduced from Fig. 2A for clarity.  $P$ -value from Kruskal-Wallis test for the  
921 difference between toluene- or non-treated samples. *post hoc* Dunn test  $p$ -values (with Holm's  
922 adjustment) refer to differences of *P. veronii* population sizes at day 56 as a function of toluene treatment  
923 between GROWING and STABLE NatComs. **(C)** and **(D)** Deviations of operationally-defined taxonomic unit  
924 (OTU level, genus name indicated) abundances in *P. veronii* (Pv) inoculated microcosms, without (D) or  
925 with toluene (E). Dots represent time-paired  $\log_{10}$ -transformed relative abundances of the same OTU  
926 across all biological replicates (arbitrarily paired among replicates) and treatments, as indicated. Upward  
927 deviations from the diagonal line indicate taxa enrichment in the inoculated microcosms, whereas  
928 downward deviations indicate taxa depletions. Magenta circles emphasize differences of more than one  
929 log to the expected value (i.e., the diagonal). Relative abundances of *P. veronii* (Pv) are presented within  
930 separate subplots on the side (color gradients follow time points as in the scale). Pie charts in (D) show  
931 relative abundances of all deviated taxa per condition (additionally labelled with roman numerals for  
932 clarity). **(E)** Total outlier distance, per treatment or inoculant, of all taxa more than ten-fold enriched (in  
933 yellow) or depleted (in purple) compared to non-inoculated or non-treated controls.  
934



935  
936  
937  
938

939 **Figure 4. Paired productivities of inoculants with random resident soil cells. (A)** Growth of either bead-  
940 encapsulated *P. veronii* (Pv) or soil cells (SC) alone, or of paired mixtures (e.g., Pv with SC, 1–2 random  
941 founder cells at start) in soil extract. Note the illustrations on the right explaining how mixed beads can by  
942 chance have true pairs of inoculant and soil cells or contain single cells of either Pv or SC. Plots show  
943 normalized histograms of microcolony sizes imaged from epifluorescence microscopy, expressed as the  
944  $\log_{10}$ -value of the Syto9-observed pixel area  $\times$  its mean fluorescence intensity. *n*, number of analyzed  
945 beads. *P*-values from Fisher’s exact test on distribution differences. **(B)** As for (A) but for different  
946 inoculants and media conditions and only showing the comparison of soil cells alone (in beads in the  
947 mixture, light brown) and in beads with soil cells and inoculants (dark green). *P*-values from Fisher’s exact  
948 test. Similar labels correspond to independent experiments. **(C)** Paired productivity plot of beads with only  
949 a single *P. veronii* and a single soil cell microcolony (OBSERVED), versus the distribution of bead-growth of  
950 *P. veronii* (Pv, salmon) or soil cells alone (SC). Pv and SC alone summed from time points 24, 48, and 72 h.  
951 Circles are proportional to the sum of the measured microcolony sizes (from light to dark blue correspond  
952 to time points 0, 6, 24, 48 and 72 h). The heatmap (PREDICTED) shows the expected paired bead summed  
953 productivities (in percentage, as per the color scale) from the individual measured microcolony sizes (i.e.,  
954 Pv and SC ALONE) for the same number of beads as analyzed by microscopy. *P*-values correspond to the  
955 two-tailed t-test comparison of the variation of the total measured paired productivities inside the three  
956 regions ( $n = 3$ ; 24, 48, and 72 h) with that in the simulations ( $n = 5$ ). The upper left region shows higher SC  
957 productivity than expected, the lower right region shows lower inoculant productivity than expected, and  
958 the diagonal shows the same productivity for both microcolonies in a pair.  
959

960



961  
962  
963  
964  
965

966 **Figure 5. Diversity changes in inoculant-soil cell bead-encapsulated communities as a function of growth**  
967 **condition. (A)** Log<sub>10</sub> read abundances of family level summed taxa in bead-encapsulated communities after  
968 48 h, either in the presence (magenta) or absence (blue) of an inoculant (resampled normalized  
969 abundances after removal of the inoculant reads). Dots indicate individual biological replicate values with  
970 a line connecting the means for the same taxa in absence or presence of the inoculant. Growth conditions  
971 as indicated. Background colors show phyla attribution. Asterisks denote significant differences (adjusted  
972 P-value < 0.05) with letters explaining the corresponding family. **(B)** Comparisons of soil-paired  
973 encapsulations with *P. veronii* versus *E. coli* incubated with Mixed-C (16 substrates), highlighting the names  
974 of consistently selectively responding families (legend in A). **(C)** Relative abundance changes of ASVs within  
975 the family of Pseudomonadaceae (after removal of the inoculant reads), as a function of incubation  
976 condition and inoculant. Dots show individual replicate values (paired arbitrarily between conditions with  
977 or without inoculant) with colors matching ASVs across conditions (specific examples emphasized with  
978 Roman numerals).  
979

980  
981  
982



983  
984  
985

**Figure 6. Exploitation of toluene degradation products from *P. veronii* by soil microbiota.** (A) Survival or proliferation of inoculated *P. veronii* in Silt, Clay, or *Jonction* soils exposed to gaseous toluene (data replotted from Ref. <sup>28</sup>). Data points are the mean from triplicate measurements of colony forming units of *P. veronii* (magenta) or resident soil microbiota (blue). Gray circle and triangle indicate time points for sampling of total community RNA (early and late time point, respectively). (B) Transcript abundances (transcripts per kilobase million (TPM) without *P. veronii* transcripts) of ribosomal proteins in the communities versus those of functions attributed to utilization of toluene or its metabolites (see panels C and D). (C) *P. veronii* toluene degradation pathway and major metabolic intermediates. Roman numerals correspond to highlighted intermediates in panel D. (D) TPM-values of transcripts annotated to the

994 aromatic compound metabolic steps on the right for Silt in three conditions tested at two stages (*early* or  
995 *late*, as in panel A). Data points show individual values from quadruplicate experiments and a line indicating  
996 the median. *P*-values correspond to t-test statistics comparison of indicated sample replicate  
997 measurements (only shown if <0.05). For details of KEGG pathway attributions, see Fig. S6.  
998  
999
